# Supplementary material for: Morphology-dependent Li+ ion dynamics in X-ray amorphous and crystalline Li3PS4 prepared by solvent-assisted synthesis
Source: Royal Society of Chemistry journal article supplement (doi:10.1039/d4dt02636e), 2024-11-04
Supplement: d4dt02636e1.pdf [file d4dt02636e1.pdf]

## Supporting Information

# Morphology-dependent Li<sup>+</sup> ion dynamics in X-ray amorphous and crystalline Li<sub>3</sub>PS<sub>4</sub> prepared by solvent-assisted synthesis

Jonas Sychala, Christoph Mandl, Katharina Hogrefe,

H. Martin R. Wilkening,\* and Bernhard Gadermaier\*

*Institute for Chemistry and Technology of Materials, Graz University of Technology,*

*AT-8010 Graz, Austria*

E-mail: wilkening@tugraz.at; bernhard.gadermaier@tugraz.at

Figure S1 shows the X-ray powder diffraction pattern of polycrystalline LPS-170 obtained after annealing at 170 °C. The results from Rietveld refinement are also included.

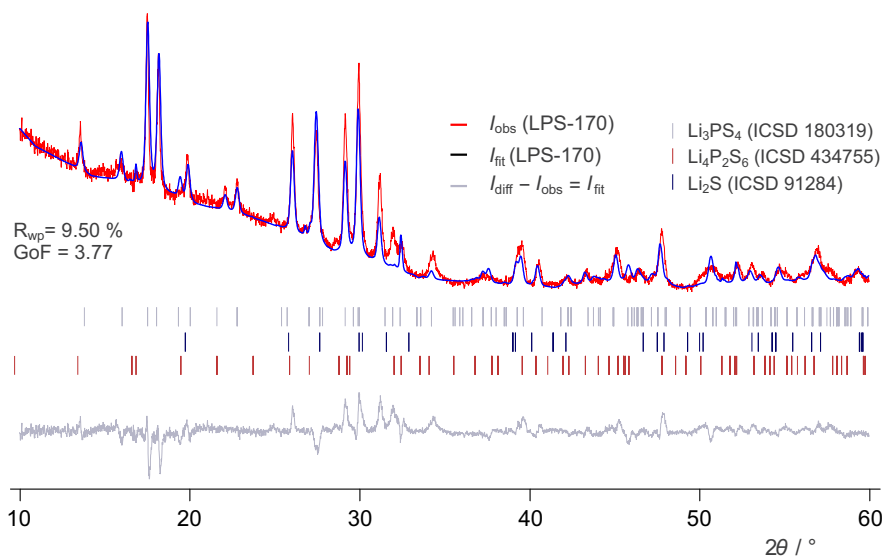

**Figure S1:** XRD pattern of LPS-170, as shown in Figure 1, together the results from Rietveld refinement (blue line) and the reference patterns of  $Li_3PS_4$ ,  $Li_4P_2S_6$  and  $Li_2S$  taken from the ICSD. The grey line at the bottom shows the difference between the refined fit and the observed diffraction pattern. The side phases each represent  $\approx 3\%$  of the sample.

In Figure S2 we compare the conductivity isotherms of the three samples investigated. The isotherms have been recorded at 40 °C; their shapes turn out to be rather similar.

Finally, the rates of mechanosynthesized  $Li_3PS_4$  recorded by Prutsch *et al.*<sup>1</sup> have also been analysed with a relaxation model that takes into account spatially restricted 1D jump diffusion, see Figure S3. The solid line in Figure S3 shows the result obtained with a sum of two  $R_1(1/T)$  rate

## Supporting Information

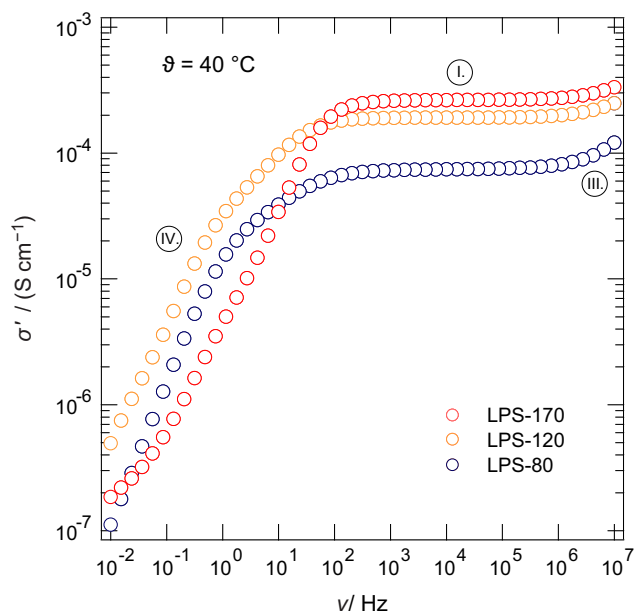

**Figure S2:** Comparison of the conductivity isotherms  $\sigma'(\nu)$  for all samples prepared, that is, LPS-170, LPS-120, and LPS-80; data recorded at  $\vartheta = 40^\circ\text{C}$ .

peaks that each use an empirical spectral density function  $J(\omega_0)$ , which properly reflects the limiting behaviour of  $R_1 \equiv 1/T_1$  for  $\omega_0\tau \ll 1$ , that is, yielding a  $\sqrt{\omega_0}$ -dependence of  $T_1$  on frequency:<sup>2</sup>

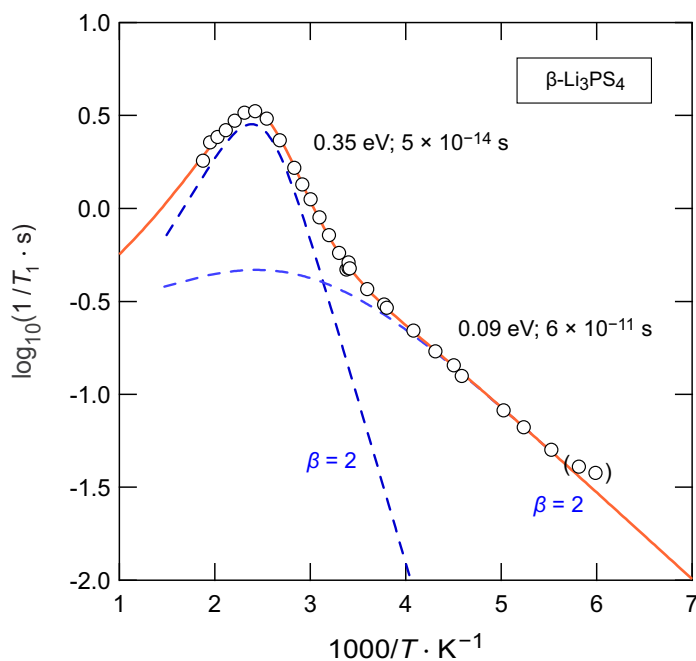

**Figure S3:**  $^7\text{Li}$  NMR relaxation rates  $R_1$  of  $\text{Li}_3\text{PS}_4$  recorded in the laboratory reference frame; the rates are identical with those shown in Figure 5a. Here, the solid line represents a fit with a sum of two rate peaks that take into account a spectral density function  $J(\omega_0)$  mirroring the limiting cases for 1D diffusion. The individual peaks are drawn by dashed lines. In both cases, the best fit was obtained with the asymmetry parameter  $\beta$  taking a value of 2, thus following ideal BPP-type behavior for which we expect  $R_1 \propto \omega_0^{-\beta}$  in the limit  $\omega_0\tau \gg 1$ .

# Supporting Information

$$J(\omega_0, \tau_c)^{1D} \propto \tau_c \frac{(\omega_0 \tau_c)^{-0.5}}{1 + (\omega_0 \tau_c)^{\beta-0.5}}$$

The relaxation rate  $R_1 \propto J(\omega_0, \tau_c)$  is hence controlled by  $\omega_0$  and  $\tau_c = \tau_{c0} \exp(-E_a/(k_B T))$ . The same function has earlier been used to parameterize the NMR relaxation in ramsdellite-type  $\text{Li}_2\text{Ti}_3\text{O}_7$ .<sup>3</sup> In Figure S3 the values in eV reflect the activation energies  $E_a$  referring to the two rate peaks. In the case of  $\beta = 2$ , which yields the best fits, the slope of the low- $T$  flank directly delivers  $E_a$  as no correlation effects ( $\beta < 2$ ) seem to affect the data. The values in s show the Arrhenius pre-exponential factors  $\tau_{c0}$ , which can be interpreted as attempt frequencies. Values as high as  $10^{14} \text{ s}^{-1}$  for  $1/\tau_{c0}$  are 1 to 1.5 orders of magnitude higher than Debye frequencies, as expected.

## References

- (1) Prutsch, D.; Gadermaier, B.; Brandstätter, H.; Pregartner, V.; Stanje, B.; Wohlmuth, D.; Epp, V.; Rettenwander, D.; Hanzu, I.; Wilkening, H. M. R. Nuclear Spin Relaxation in Nanocrystalline  $\beta\text{-Li}_3\text{PS}_4$  Reveals Low-Dimensional Li Diffusion in an Isotropic Matrix. *Chem. Mater.* **2018**, *30*, 7575–7586.
- (2) Heine, J. NMR- und impedanzspektroskopische Untersuchungen an Lithium-Ionenleitern mit eingeschränkter Dimensionalität der Diffusion. Doctoral Thesis, Leibniz University of Hannover, Leibniz University of Hannover, 2020.
- (3) Volgmann, K.; Epp, V.; Langer, J.; Stanje, B.; Heine, J.; Nakhal, S.; Lerch, M.; Wilkening, M.; Heitjans, P. Solid-State NMR to Study Translational Li Ion Dynamics in Solids with Low-Dimensional Diffusion Pathways. *Z. Phys. Chem.* **2017**, *231*, 1215–1241.
